# Supplementary material for: Iron complexes of bridging azo ligands in aqueous solution: changes in the thermal switching mechanism on coordination and oxidation state of metal centres
Source: Royal Society of Chemistry journal article supplement (doi:10.1039/d2dt03790d), 2022-12-21
Supplement: d2dt03790d1.pdf [file d2dt03790d1.pdf]

## **Iron complexes of bridging azo ligands in aqueous solution; changes in the thermal switching mechanism on coordination and oxidation state of metal centres**

*Manuel Bardaji,<sup>a</sup> Mercè Font-Bardia,<sup>b</sup> Albert Gallen,<sup>c</sup> Beltzane Garcia-Cirera,<sup>c</sup> Montserrat Ferrer,<sup>c,d\*</sup> and Manuel Martínez<sup>c,d\*</sup>*

<sup>a</sup> IU CINQUIMA/Química Inorgánica, Facultad de Ciencias, Universidad de Valladolid, 47071 Valladolid, Spain

<sup>b</sup> Unitat de Difracció de RX, Centres Científics i Tecnològics de la Universitat de Barcelona (CCiTUB). Universitat de Barcelona, Solé i Sabarís 1-3, 08028 Barcelona, Spain

<sup>c</sup> Secció de Química Inorgànica, Departament de Química Inorgànica i Orgànica. Universitat de Barcelona, Martí i Franquès 1-11, 08028 Barcelona, Spain

<sup>d</sup> Institute of Nanoscience and Nanotechnology (IN2UB), Universitat de Barcelona, 08028 Barcelona, Spain

[montse.ferrer@qi.ub.edu](mailto:montse.ferrer@qi.ub.edu), [manel.martinez@qi.ub.edu](mailto:manel.martinez@qi.ub.edu)

## **SUPPORTING INFORMATION**

## Synthesis and characterization of the ligands

According to the literature,<sup>1-2</sup> the synthesis of the isocyanide azo derivatives has been carried out in three steps that are outlined as follows:

### Synthesis of 4-((4-isocyanophenyl)diazenyl)pyridine, CN(C<sub>6</sub>H<sub>4</sub>)-N=N-(C<sub>5</sub>H<sub>4</sub>N)

**Step 1: 4-((4-aminophenyl)diazenyl)pyridine.** 4-aminopyridine (3 g, 32 mmol) was suspended in tetrafluoroboric acid (23 cm<sup>3</sup>, 50 % in water). The resulting suspension was cooled down to 0 °C with an ice bath. The formation of a white milky solution is observed. Then, sodium nitrite (2.2 g, 32 mmol) was added slowly keeping the temperature at 0 °C and the color of the resulting solution becomes pale yellow. After stirring at 0 °C for further 30 minutes, aniline (6 g, 64 mmol) was added and the formation of a dark brown suspension was observed. The reaction mixture was stirred at room temperature for 30 minutes. The addition of a concentrated NaOH solution (22 g NaOH in 75 mL water) led to the precipitation of a dark brown solid that was filtered and washed thoroughly with water and acetonitrile to obtain the product as an orange solid (1.37 g, 22%). <sup>1</sup>H NMR (CDCl<sub>3</sub>, 400 MHz): δ 8.73 (d, <sup>3</sup>J<sub>HH</sub> = 6.2 Hz, 2H, H<sub>α-py</sub>), 7.84 (d, J<sub>HH</sub> = 7.7 Hz, 2H, H<sub>meta</sub> PhNH<sub>2</sub>), 7.63 (d, J<sub>HH</sub> = 6.2 Hz, 2H, H<sub>β-py</sub>), 6.75 (d, J<sub>HH</sub> = 7.7 Hz, 2H, H<sub>ortho</sub>PhNH<sub>2</sub>), 4.22 (s, 2H, NH<sub>2</sub>).

**Step 2: N-(4-(pyridin-4-yl diazenyl)phenyl)formamide.** In a N<sub>2</sub> purged Schlenk flask 1 mL (26 mmol) of formic acid and 2.5 mL (26 mmol) of acetic anhydride were added and stirred for 2 h at 50-60 °C. After cooling to room temperature 4-((4-aminophenyl)diazenyl)pyridine (2.20 g, 11 mmol) and 75-100 mL of dry Et<sub>2</sub>O were subsequently added. After 60 h of stirring the desired product was obtained as an orange solid that was filtered and vacuum dried. (2.42 g, 96%). <sup>1</sup>H NMR (DMSO-d<sub>6</sub>, 400 MHz): δ (*cis ca.* 80%) 10.67 (s, 1H, NH), 8.81 (d, J<sub>HH</sub> = 5.2 Hz, H<sub>α-py</sub>), 8.39 (s, 1H, -CO-H), 7.97 (d, J<sub>HH</sub> = 8.5 Hz, H<sub>meta</sub>PhNH), 7.85 (d, J<sub>HH</sub> = 8.5 Hz, 2H, H<sub>ortho</sub>PhNH), 7.72 (d, J<sub>HH</sub> = 5.2 Hz, H<sub>β-py</sub>); (*trans ca.* 20%) 10.58 (d, J<sub>HH</sub> = 10.1 Hz, 1H, NH), 9.04 (d, J<sub>HH</sub> = 10.3 Hz, 1H, -CO-H), 8.81 (superimposed with the isomer *cis* signal, 2H, H<sub>α-py</sub>), 7.97 (superimposed with the isomer *cis* signal, H<sub>meta</sub>PhNH), 7.72 (superimposed with the isomer *cis* signal, H<sub>β-py</sub>), 7.45 (d, J<sub>HH</sub> = 8.4 Hz, 2H, H<sub>ortho</sub>PhNH).

**Step 3: 4-((4-isocyanophenyl)diazenyl)pyridine.** N-(4-(pyridin-4-yl diazenyl)phenyl)formamide (2.5 g, 11 mmol) was dissolved in 50 mL of dry CH<sub>2</sub>Cl<sub>2</sub> under N<sub>2</sub> atmosphere. After adding triethylamine (3 mL, 21 mmol) the mixture was cooled down to 0 °C and a solution of triphosgene (1.1 g, 3.7 mmol) in 20 mL of dry CH<sub>2</sub>Cl<sub>2</sub> was added dropwise. The reaction mixture was left under stirring overnight at room temperature and a brown suspension was obtained that was treated with a saturated aqueous Na<sub>2</sub>CO<sub>3</sub> solution. After extracting three times with CH<sub>2</sub>Cl<sub>2</sub> the combined organic layers were dried over Na<sub>2</sub>SO<sub>4</sub> and the dark red solution obtained taken to dryness. The crude product was dissolved in the minimum volume of CH<sub>2</sub>Cl<sub>2</sub> and purified by column chromatography on silica gel using CH<sub>2</sub>Cl<sub>2</sub>:CH<sub>3</sub>OH 100:1 to get 1.1 g of an orange solid. Yield: 48%. <sup>1</sup>H NMR (CDCl<sub>3</sub>, 400 MHz): δ (*trans*) 8.84 (d, J<sub>HH</sub> = 6.2 Hz, 2H, H<sub>α-py</sub>), 8.01 (d, J<sub>HH</sub> = 8.4 Hz, 2H, H<sub>meta</sub>PhNC), 7.72 (d, J<sub>HH</sub> = 6.1 Hz, 2H, H<sub>β-py</sub>), 7.56 (d, J<sub>HH</sub> = 8.6 Hz, 2H, H<sub>ortho</sub>PhNC). <sup>1</sup>H NMR (CD<sub>3</sub>OD, 400 MHz): δ (*trans*) 8.79 (d, J<sub>HH</sub> = 6.2 Hz, 2H, H<sub>α-py</sub>), 8.09 (d, J<sub>HH</sub> =

8.5 Hz, 2H, H<sub>meta</sub>PhNC), 7.86 (d, J<sub>HH</sub> = 6.3 Hz, 2H, H<sub>β-py</sub>), 7.71 (d, J<sub>HH</sub> = 8.5 Hz, 2H, H<sub>ortho</sub>PhNC); (*cis* after irradiation) 8.46 (d, J<sub>HH</sub> = 6.3 Hz, 2H, H<sub>α-py</sub>), 8.42 (d, J<sub>HH</sub> = 8.6 Hz, 2H, H<sub>meta</sub>PhNC), 6.99 (d, J<sub>HH</sub> = 8.6 Hz, 2H, H<sub>ortho</sub>PhNC), 6.88 (d, J<sub>HH</sub> = 6.3 Hz, 2H, H<sub>β-py</sub>). <sup>13</sup>C NMR (CDCl<sub>3</sub>, 100.6 MHz): δ (*trans*) 167.2 (NC), 156.7 (C<sub>q-N=N</sub>), 151.7 (C<sub>q-N=N</sub>), 151.7 (C<sub>α-py</sub>), 129.4 (br, C<sub>q-NC</sub>), 127.6 (C<sub>ortho</sub>PhNC), 124.6 (C<sub>meta</sub>PhNC), 116.4 (C<sub>β-py</sub>). IR (ν<sub>CN</sub>): 2142 cm<sup>-1</sup>. MS (ESI+) m/z: {[CN(C<sub>6</sub>H<sub>4</sub>)-N=N-(C<sub>5</sub>H<sub>4</sub>N)]+H<sup>+</sup>}<sup>+</sup>, 209.08 (*calc.* 209.08). UV-vis (Toluene) [λ<sub>max</sub>, nm (ε, M<sup>-1</sup> cm<sup>-1</sup>)] (toluene) 318 (22800), 465 (420); (methanol) 314 (22700), 440 (760). CV (Acetonitrile, vs NHE, ferrocene reference): -619, -1070 mV.

### **Synthesis of 4-((4-isocyanophenyl)diazenyl)benzonitrile, CN(C<sub>6</sub>H<sub>4</sub>)-N=N-(C<sub>5</sub>H<sub>4</sub>)CN**

**Step 1: 4-((4-aminophenyl)diazenyl)benzonitrile.** This compound was prepared following the same procedure as described above for the compound 4-((4-aminophenyl)diazenyl)pyridine. From 4-aminobenzonitrile (3.8 g, 32 mmol), 1.1 g of the desired compound were obtained (15% yield). <sup>1</sup>H NMR (CDCl<sub>3</sub>, 400 MHz): δ 7.90 (d, J<sub>HH</sub> = 8.8 Hz, 2H, H<sub>meta</sub>PhCN), 7.84 (d, J<sub>HH</sub> = 8.8 Hz, 2H, H<sub>meta</sub>PhNH<sub>2</sub>), 7.76 (d, <sup>3</sup>J<sub>HH</sub> = 8.8 Hz, 2H, H<sub>ortho</sub>PhCN), 6.75 (d, <sup>3</sup>J<sub>HH</sub> = 8.8 Hz, 2H, H<sub>ortho</sub>PhNH<sub>2</sub>), 4.22 (s, 2H, NH<sub>2</sub>).

**Step 2: N-(4-(cyanophenyl)diazenyl)phenylformamide.** In a N<sub>2</sub> purged Schlenk flask 2.5 mL (66 mmol) of formic acid and 6.2 mL (66 mmol) of acetic anhydride were added and stirred for 2 h at 50-60 °C. After cooling to room temperature 4-((4-aminophenyl)diazenyl)benzonitrile (1.0 g, 4.5 mmol) and 75-100 mL of dry THF were subsequently added. After 60 h of stirring the resulting suspension is taken to dryness and the resulting orange solid was vacuum dried while heating at 30 °C for 24h. (1.10 g, 97%). <sup>1</sup>H NMR (DMSO-d<sub>6</sub>, 500 MHz): δ (*cis ca.* 70%) 10.82 (s, 1H, NH), 8.38 (s, 1H, -CO-H), 8.05 (d, J<sub>HH</sub> = 8.1 Hz, H<sub>meta</sub>PhCN), 7.99-7.94 (m, H<sub>ortho</sub>PhCN + H<sub>meta</sub>PhNH), 7.85 (d, J<sub>HH</sub> = 8.5 Hz, 2H, H<sub>ortho</sub>PhNH); (*trans ca.* 30%) 10.59 (br s, 1H, NH), 9.02 (d, J<sub>HH</sub> = 8.4 Hz, 1H, -CO-H), 8.05 (superimposed with the isomer *cis* signal, H<sub>meta</sub>PhCN), 7.99-7.94 (superimposed with the isomer *cis* signals, H<sub>ortho</sub>PhCN + H<sub>meta</sub>PhNH), 7.45 (d, J<sub>HH</sub> = 8.2 Hz, 2H, H<sub>ortho</sub>PhNH).

**Step 3: 4-((4-isocyanophenyl)diazenyl)benzonitrile.** This compound was prepared following a very similar procedure to that described above for the compound 4-((4-isocyanophenyl)diazenyl)pyridine. From N-(4-(cyanophenyl)diazenyl)phenylformamide (2.8 g, 11 mmol) the crude product was purified by column chromatography on silica gel using CH<sub>2</sub>Cl<sub>2</sub> to get, after recrystallization in the same solvent, 0.9 g of the desired compound as a pure orange solid. Yield: 35%. <sup>1</sup>H NMR (CDCl<sub>3</sub>, 400 MHz): δ (*trans*) 8.02-7.98 (m, 4H, H<sub>meta</sub>PhCN+ H<sub>meta</sub>PhNC), 7.84 (d, J<sub>HH</sub> = 8.5 Hz, 2H, H<sub>ortho</sub>PhCN), 7.57 (d, J<sub>HH</sub> = 8.7 Hz, 2H, H<sub>ortho</sub>PhNC). <sup>1</sup>H NMR (CD<sub>3</sub>OD, 400 MHz): δ (*trans*) 8.09-8.05 (m, 4H, H<sub>meta</sub>PhCN+ H<sub>meta</sub>PhNC), 7.96 (d, J<sub>HH</sub> = 8.8 Hz, 2H, H<sub>ortho</sub>PhCN), 7.69 (d, J<sub>HH</sub> = 8.7 Hz, 2H, H<sub>ortho</sub>PhNC); (*cis* after irradiation) 7.41 + signal obscured by H<sub>ortho</sub>PhNC of *trans* isomer (H<sub>meta</sub>Ph), 7.01 (d, J<sub>HH</sub> = 8.7 Hz, 2H, H<sub>ortho</sub>PhCN), 6.96 (d, J<sub>HH</sub> = 8.8 Hz, 2H, H<sub>ortho</sub>PhNC). <sup>13</sup>C NMR (CDCl<sub>3</sub>, 125.7 MHz): δ (*trans*) 167.2 (NC), 154.2 (C<sub>q-N=N</sub>), 151.9 (C<sub>q-N=N</sub>), 133.5 (C<sub>ortho</sub>PhCN), 129.1 (br, C<sub>q-NC</sub>), 127.7 (C<sub>ortho</sub>PhNC), 124.5 (C<sub>meta</sub>PhNC), 123.7 (C<sub>meta</sub>PhCN), 118.4 (CN), 114.9 (C<sub>q-CN</sub>). IR (ν<sub>CN</sub>): 2227, 2127 cm<sup>-1</sup>. MS (ESI+) m/z: {[CN(C<sub>6</sub>H<sub>4</sub>)-N=N-(C<sub>6</sub>H<sub>4</sub>)CN]+H<sup>+</sup>}<sup>+</sup>, 233.08 (*calc.* 233.08). UV-vis [λ<sub>max</sub>, nm (ε, M<sup>-1</sup> cm<sup>-1</sup>)] (toluene) 333 (21800), 452

(580); (methanol) 326 (23600), 450 (370). CV (Acetonitrile, vs NHE, ferrocene reference): -619, -1070 mV.

### **Synthesis of 4,4'-diisocyanazobenzene, CN(C<sub>6</sub>H<sub>4</sub>)-N=N-(C<sub>6</sub>H<sub>4</sub>)NC**

*Step 1: 4,4'-diaminoazobenzene.* This compound was prepared accordingly to the described procedure.<sup>4</sup>

*Step 2: 4,4'-diformamidoazobenzene.* This compound was prepared following the same procedure as described above for the compound N-(4-(cyanophenyl)diazenyl)phenylformamide. From 4,4'-diaminoazobenzene (1.0 g, 4.7 mmol), formic acid (6 mL, 159 mmol) and acetic acid (15 mL, 159 mmol) 1.10 g of the desired compound were obtained (87% yield). <sup>1</sup>H NMR (DMSO-d<sub>6</sub>, 400 MHz): δ (*cis-cis ca.* 80%) 10.53 (s, 2H, NH), 8.35 (s, 2H, -CO-H), 7.87 (m, 8.85 Hz, H<sub>meta</sub>PhNH), 7.79 (d, J<sub>HH</sub> = 8.9 Hz, 4H, H<sub>ortho</sub>PhCN); (*trans-trans ca.* 20%) 10.46 (d, J<sub>HH</sub> = 10.8 Hz, 2H, NH), 8.97 (d, J<sub>HH</sub> = 10.8 Hz, 2H, -CO-H), 7.87 (superimposed with the isomer *cis-cis* signal, H<sub>meta</sub>PhNH), 7.40 (d, J<sub>HH</sub> = 8.5 Hz, 4H, H<sub>meta</sub>PhNH).

*Step 3: 4,4'-diisocyanazobenzene.* This compound was prepared following a very similar procedure to that described above for the compound 4-((4-isocyanophenyl)diazenyl)pyridine. From 4,4'-diformamidoazobenzene (1.5 g, 5.6 mmol) the crude product was washed with CH<sub>3</sub>OH and purified by column chromatography on silica gel using CH<sub>2</sub>Cl<sub>2</sub> to get after concentration to vacuum of the eluate 0.6 g of the desired compound as a pure orange solid. Yield: 36%. <sup>1</sup>H NMR in CDCl<sub>3</sub> of both isomers of the compound agrees with the data available in the literature.<sup>5</sup> <sup>1</sup>H NMR (CD<sub>3</sub>OD, 400 MHz): δ (*trans*) 8.04 (d, J<sub>HH</sub> = 8.8 Hz, 2H, H<sub>meta</sub>PhNC), 7.68 (d, J<sub>HH</sub> = 8.7 Hz, 2H, H<sub>ortho</sub>PhNC); (*cis* after irradiation) 7.41 (d, J<sub>HH</sub> = 8.6 Hz, 2H, H<sub>meta</sub>PhNC), 6.95 (d, J<sub>HH</sub> = 8.7 Hz, 2H, H<sub>ortho</sub>PhNC). <sup>13</sup>C NMR (CDCl<sub>3</sub>, 100.6 MHz): δ (*trans*) 166.8 (NC), 151.8 (C<sub>q</sub>-N=N), 128.7 (br, C<sub>q</sub>-NC), 127.75 (C<sub>ortho</sub>PhNC), 124.2 (C<sub>meta</sub>PhNC), IR (ν<sub>CN</sub>): 2127 cm<sup>-1</sup>. MS (ESI+) m/z: {[CN(C<sub>6</sub>H<sub>4</sub>)-N=N-(C<sub>6</sub>H<sub>4</sub>)NC]+H<sup>+</sup>}<sup>+</sup>, 233.08 (*calc.* 233.07). UV-vis [λ<sub>max</sub>, nm (ε, M<sup>-1</sup> cm<sup>-1</sup>)] (toluene) 327 (24850), 342 sh (20500), 452 (760); (methanol) 335 (24850), 351 sh (20570), 452 (620). CV (Acetonitrile, vs NHE, ferrocene reference): -580, -1020 mV.

### **REFERENCES**

1. Olumba, M. E.; Na, H.; Friedman, A. E.; Teets, T. S., Coordination-Driven Self-Assembly of Cyclometalated Iridium Squares Using Linear Aromatic Diisocyanides. *Inorganic Chemistry* **2021**, *60* (8), 5898-5907.
2. Wagner, N. L.; Murphy, K. L.; Haworth, D. T.; Bennett, D. W., Para-Substituted Aryl Isocyanides. In *Inorganic Syntheses*, 2004; Vol. 34, pp 24-29.
3. Doublets correspond to the most intense signals of an AA'XX' system.
4. Dąbrowa, K.; Niedbała, P.; Jurczak, J., Anion-tunable control of thermal Z→E isomerisation in basic azobenzene receptors. *Chemical Communications* **2014**, *50* (99), 15748-15751.
5. Yamamoto, Y.; Nakamura, H.; Ma, J.-F., Preparation and characterization of ruthenium(II), rhodium(III) and iridium(III) complexes of isocyanide bearing the azo group. *Journal of Organometallic Chemistry* **2001**, *640* (1), 10-20.

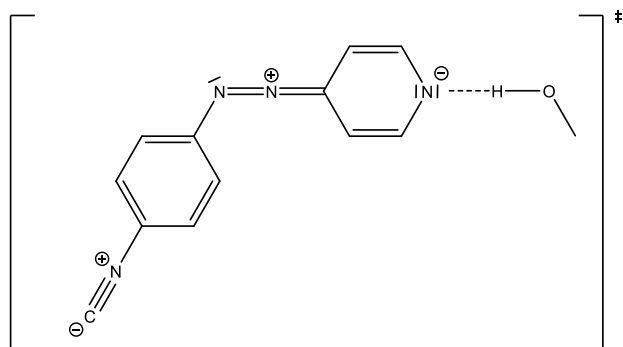

**Scheme S1.-** Proposed charge-separated transition state for the *cis*-to-*trans* spontaneous process on the  $\text{CN}(\text{C}_6\text{H}_4)\text{-N=N-(C}_5\text{H}_4\text{N)}$  ligand in methanol solution.

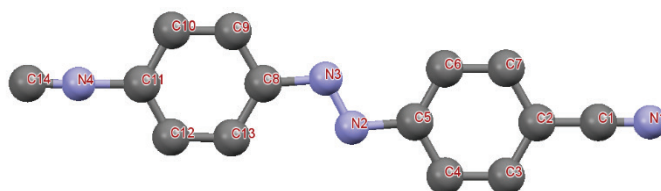

**Figure S1.-** Ball and stick plot of the XRD structure of the compound  $\text{CN}(\text{C}_6\text{H}_4)\text{-N=N-(C}_6\text{H}_4\text{)CN}$  (Hydrogen atoms have been omitted for clarity).

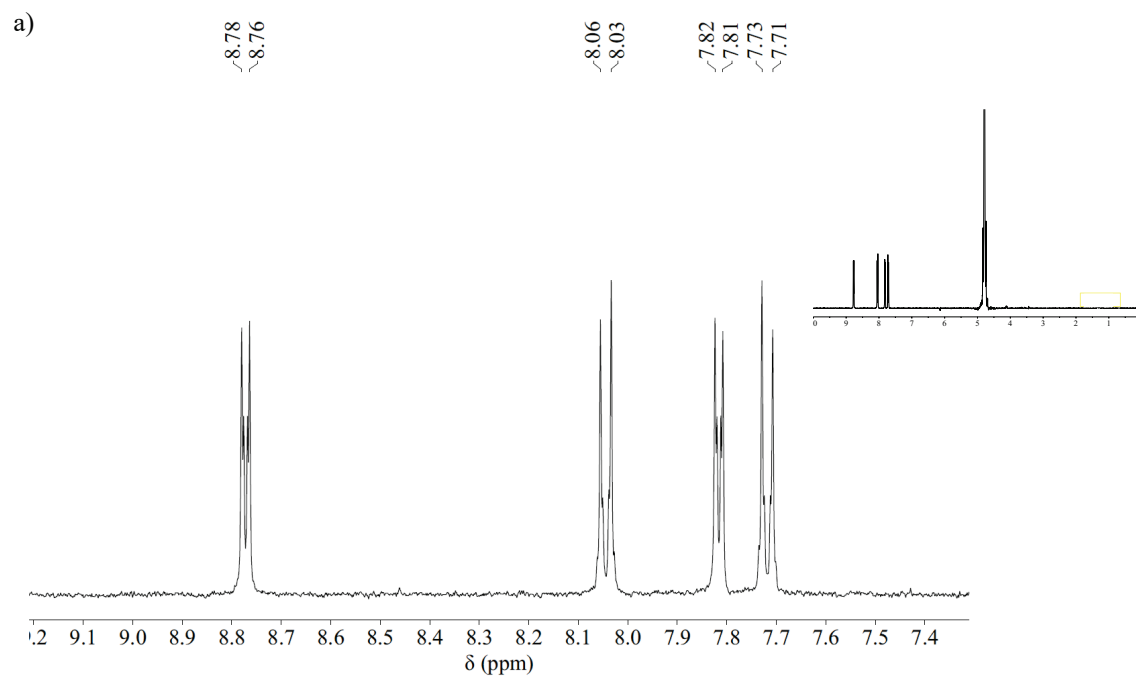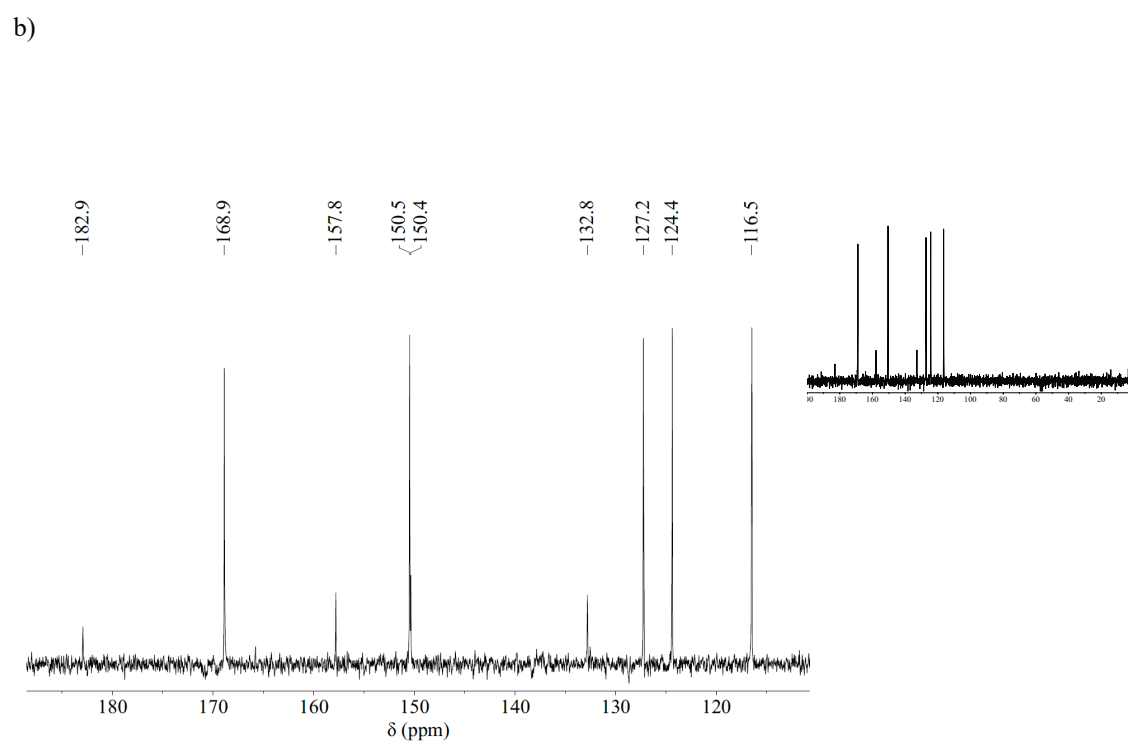

**Figure S2.-** a)  $^1\text{H}$  and b)  $^{13}\text{C}$  NMR ( $\text{D}_2\text{O}$ ) spectra of  $\text{Na}_3[(\text{NC})_5\text{Fe}^{\text{II}}\text{CN}(\text{C}_6\text{H}_4)\text{-N=N-(C}_5\text{H}_4\text{N)}]$  (**py-isoFe<sup>II</sup>**).

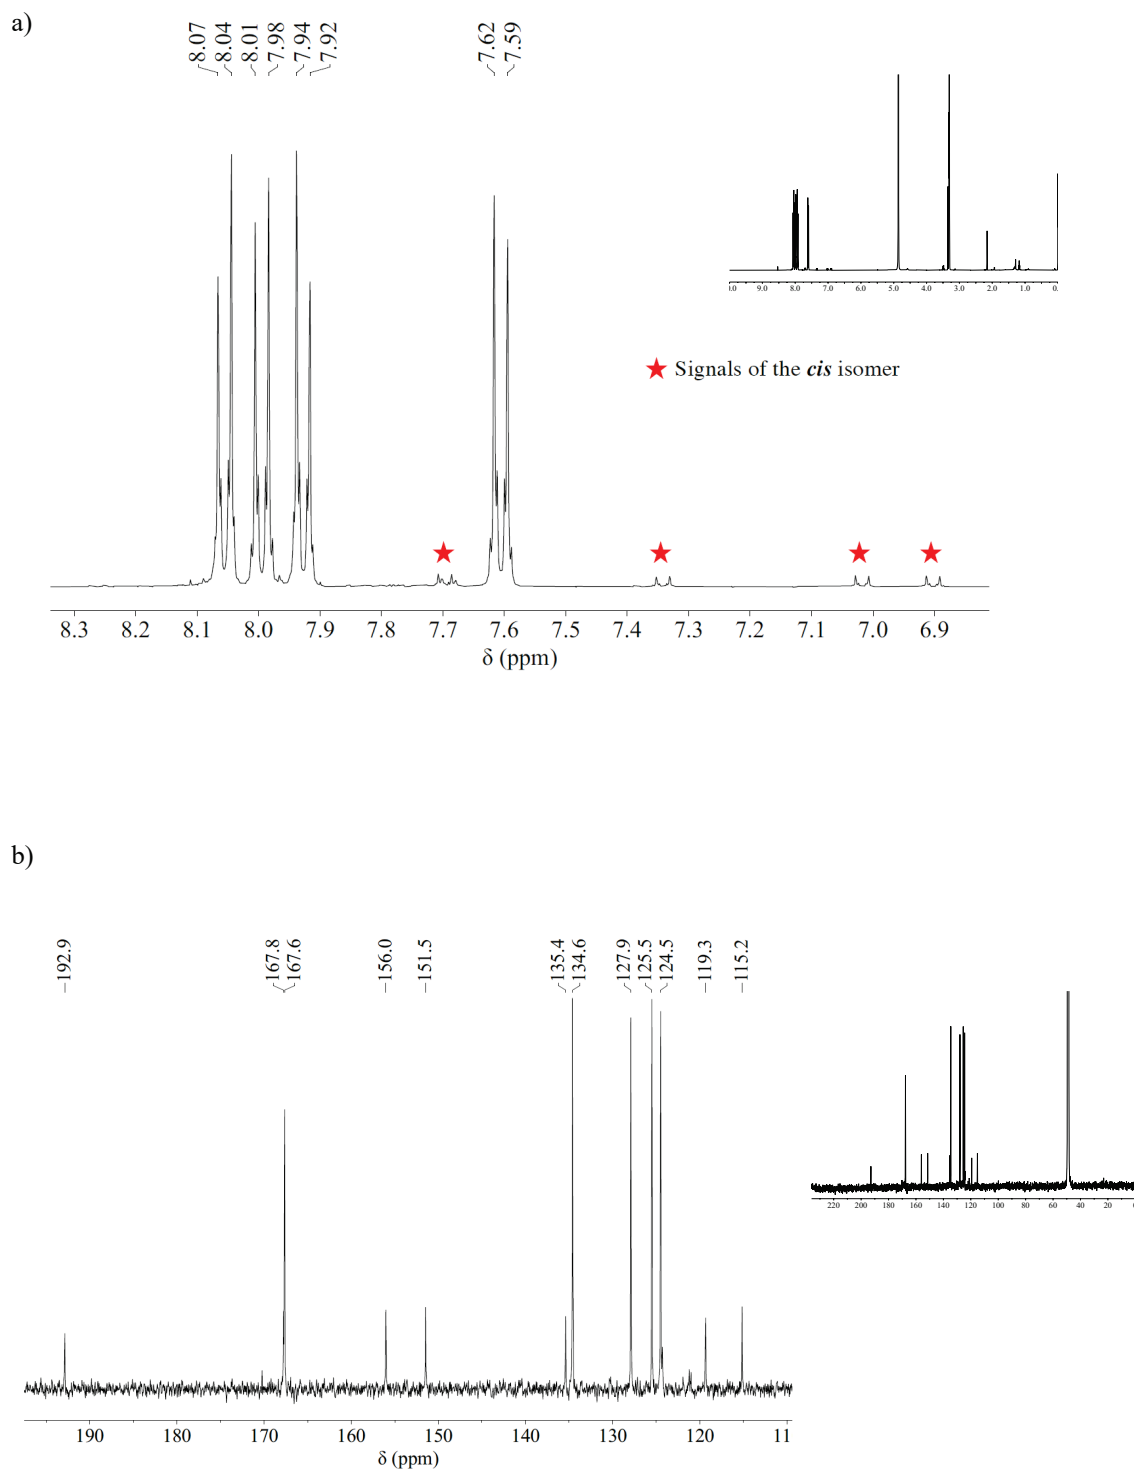

**Figure S3.-** a)  $^1\text{H}$  and b)  $^{13}\text{C}$  NMR ( $\text{CD}_3\text{OD}$ ) spectra of  $\text{Na}_3[(\text{NC})_5\text{Fe}^{\text{II}}\text{CN}(\text{C}_6\text{H}_4)\text{-N=N-(C}_6\text{H}_4\text{)CN}]$  (cyano-iso $\text{Fe}^{\text{II}}$ ).

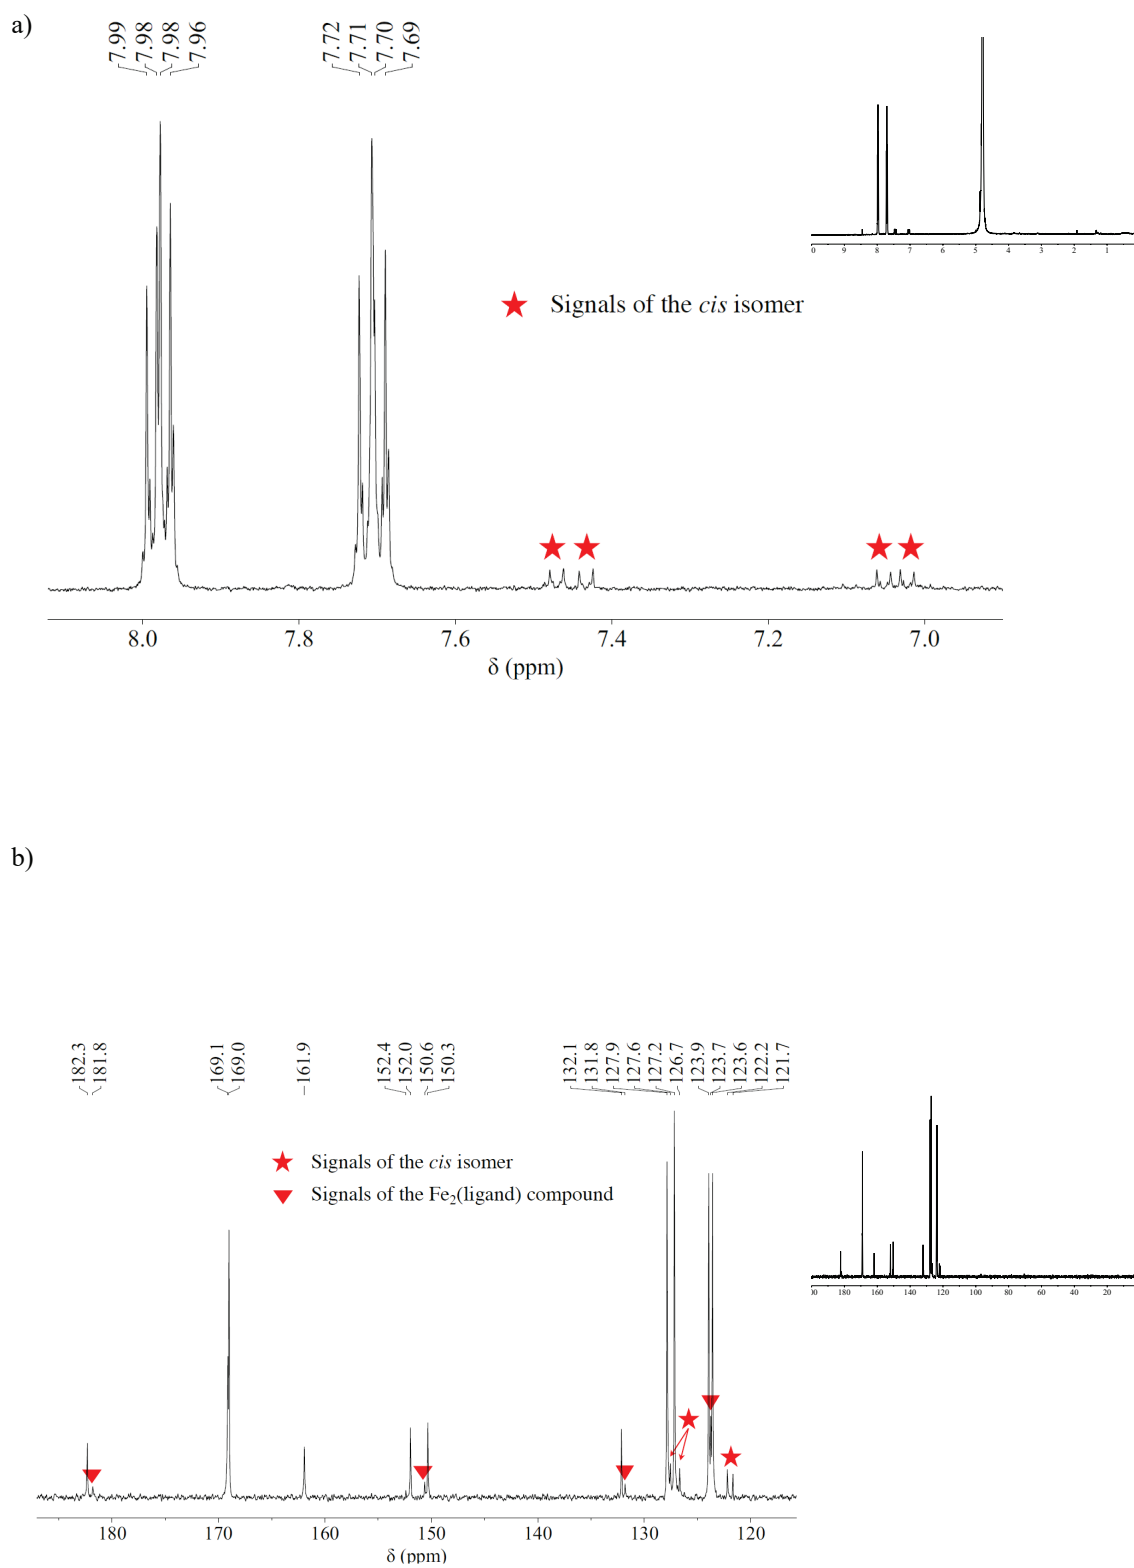

**Figure S4.-** a)  $^1\text{H}$  and b)  $^{13}\text{C}$  NMR ( $\text{D}_2\text{O}$ ) spectra of  $\text{Na}_3[(\text{NC})_5\text{Fe}^{\text{II}}\text{CN}(\text{C}_6\text{H}_4)\text{-N=N-(C}_6\text{H}_4\text{)NC}]$  (**iso- $\text{Fe}^{\text{II}}$** ).



a)

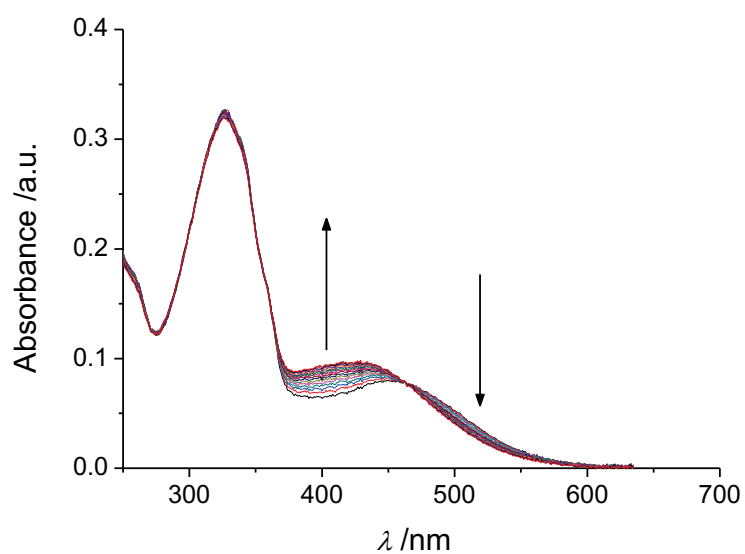

b)

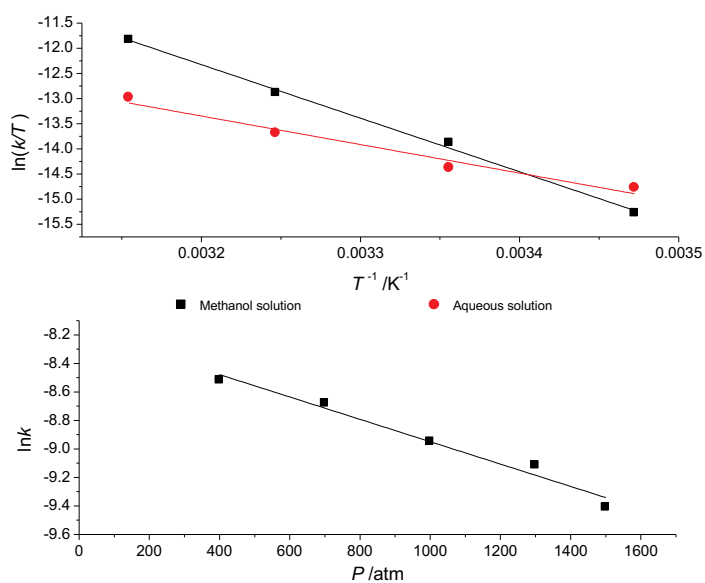

**Figure S5.-** a) Typical UV-Vis spectral changes observed after irradiation of a methanol solution of  $\text{Na}_3[(\text{NC})_5\text{Fe}^{\text{II}}\text{CN}(\text{C}_6\text{H}_4)\text{-N=N-(C}_6\text{H}_4\text{)CN}]$  at 15 °C and b) Eyring (top) and  $\ln k$  versus  $P$  (bottom) plots obtained from the variation of the observed rate constants in aqueous and methanol solutions of the same compound.

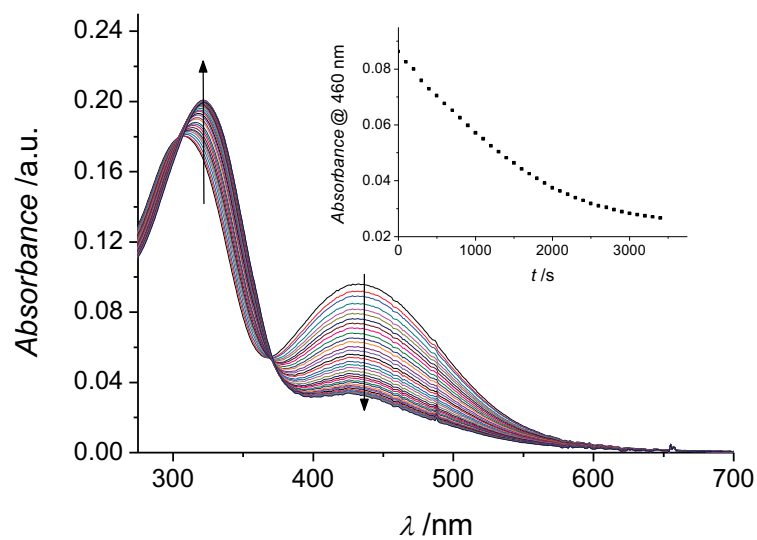

**Figure S6.**- UV-Vis spectral changes observed for the reaction of  $[(\text{NC})_5\text{Fe}^{\text{II}}\text{CN}(\text{C}_6\text{H}_4)\text{-N=N-(C}_3\text{H}_4\text{N})]^{3-}$  with  $\text{S}_2\text{O}_8^{2-}$ .  $[\text{Fe}^{\text{II}}] = 1 \times 10^{-5}$  M,  $[\text{S}_2\text{O}_8^{2-}] = 1 \times 10^{-3}$  M,  $I = 0.2$  M ( $\text{NaClO}_4$ );  $T = 45$  °C.

a)

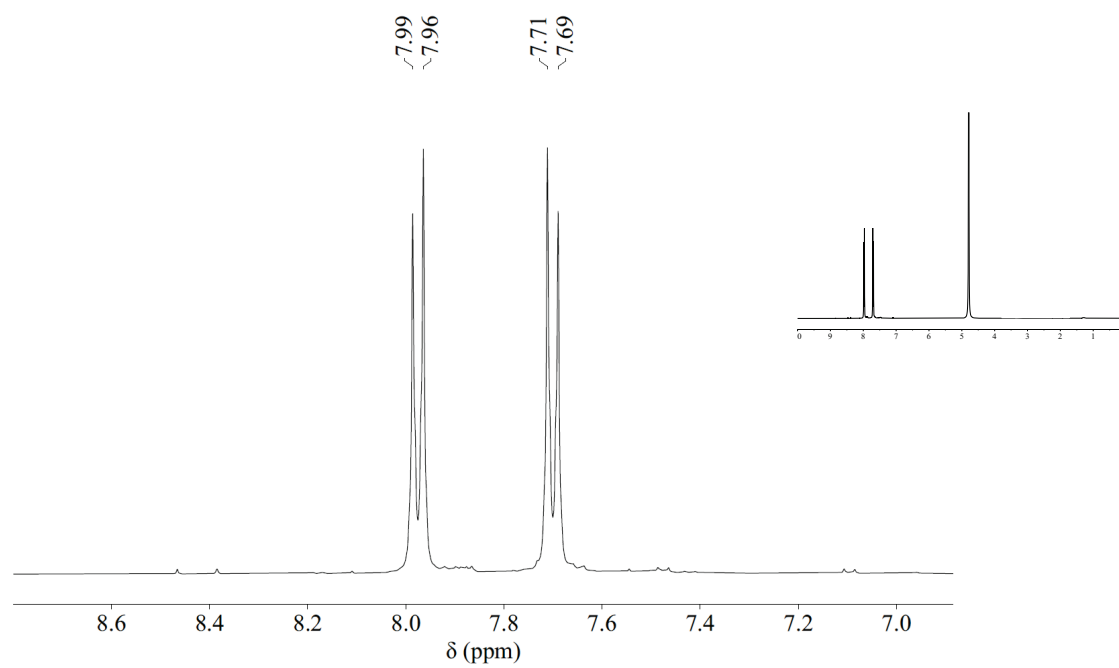

b)

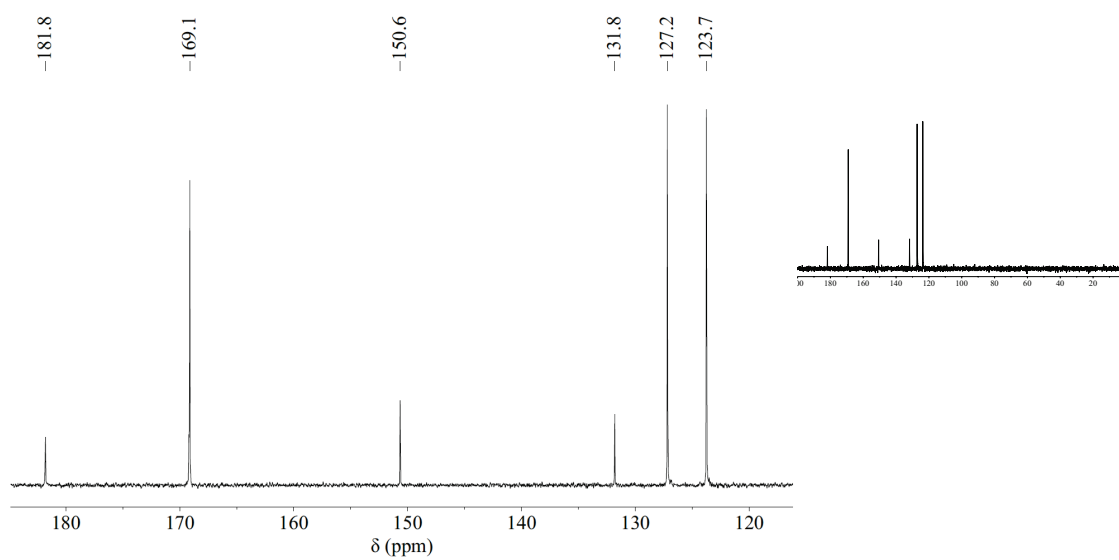

**Figure S7.-** a)  $^1\text{H}$  and b)  $^{13}\text{C}$  NMR ( $\text{D}_2\text{O}$ ) spectra of  $\text{Na}_6[(\text{NC})_5\text{Fe}^{\text{II}}\text{CN}(\text{C}_6\text{H}_4)\text{-N=N-(C}_6\text{H}_4\text{)NCFe}^{\text{II}}(\text{CN})_5]$  ( $\text{Fe}^{\text{II}}\text{-iso-isoFe}^{\text{II}}$ ).

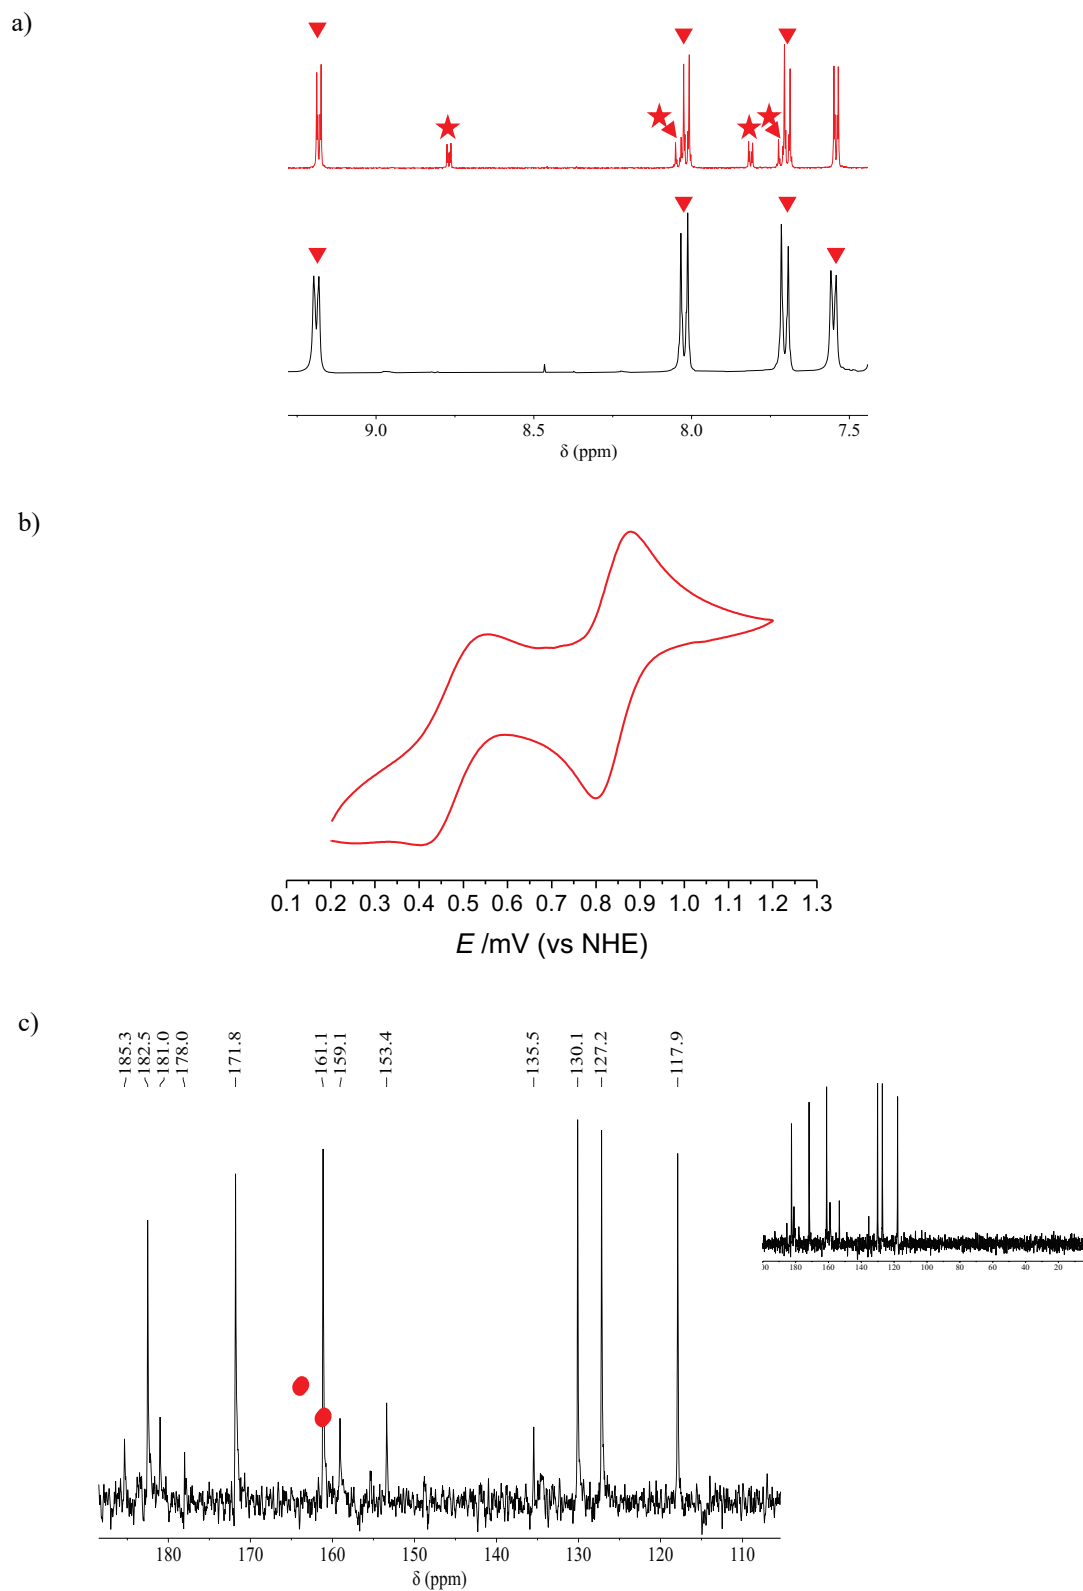

**Figure S8.-** a)  $^1\text{H}$  NMR ( $\text{D}_2\text{O}$ ) spectrum of  $\text{Na}_6[(\text{NC})_5\text{Fe}^{\text{II}}\text{CN}(\text{C}_6\text{H}_4)\text{-N=N-(C}_5\text{H}_4\text{N)Fe}^{\text{II}}(\text{CN})_5]$  ( $\text{Fe}^{\text{II}}\text{py-isoFe}^{\text{II}}$ ), immediately after dissolution (black) and after two hours (red, stars correspond to the signals of the  $\text{Na}_3[(\text{NC})_5\text{Fe}^{\text{II}}\text{CN}(\text{C}_6\text{H}_4)\text{-N=N-(C}_5\text{H}_4\text{N)]}$  compound). b) CV of  $\text{Na}_6[(\text{NC})_5\text{Fe}^{\text{II}}(\text{NC}_5\text{H}_4)\text{-N=N-(C}_6\text{H}_4\text{)NCFe}^{\text{II}}(\text{CN})_5]$  immediately after dissolution in water. c)  $^{13}\text{C}$  NMR ( $\text{D}_2\text{O}$ ) spectra of  $\text{Na}_6[(\text{NC})_5\text{Fe}^{\text{II}}\text{CN}(\text{C}_6\text{H}_4)\text{-N=N-(C}_5\text{H}_4\text{N)Fe}^{\text{II}}(\text{CN})_5]$  (red dots indicate the presence of the  $[\text{Fe}(\text{CN})_5(\text{H}_2\text{O})]^{3-}$  compound).

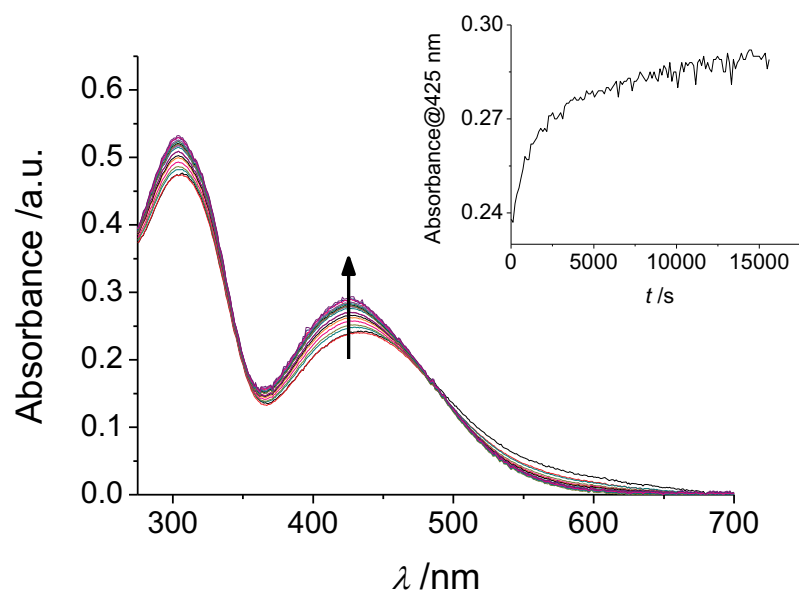

**Figure S9.-** Time-resolved UV-Vis spectral changes observed on dissolution of the complex  $\text{Na}_6[(\text{NC})_5\text{Fe}^{\text{II}}(\text{NC}_5\text{H}_4)\text{-N=N-(C}_6\text{H}_4\text{)NCFe}^{\text{II}}(\text{CN})_5]$  in water at 35 °C.

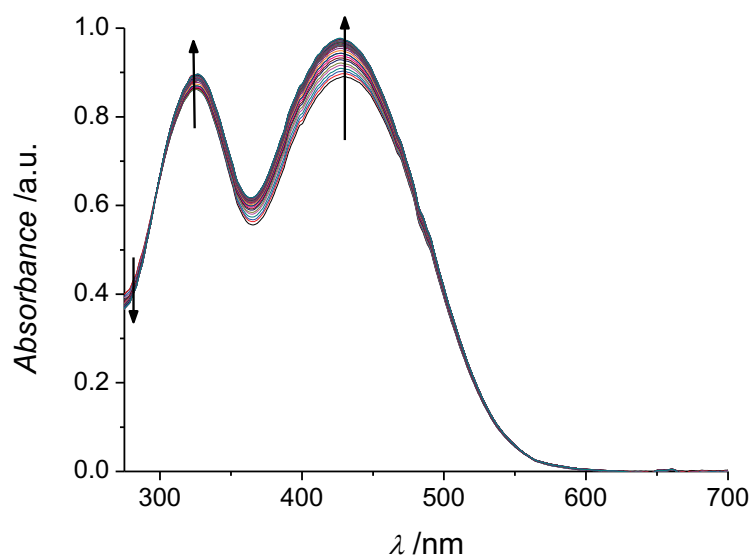

**Figure S10.-** UV-Vis spectral changes observed after irradiation of a methanol  $4 \times 10^{-5}$  M solution of  $\text{Na}_6[(\text{NC})_5\text{Fe}^{\text{II}}\text{CN(C}_6\text{H}_4\text{)-N=N-(C}_6\text{H}_4\text{)NCFe}^{\text{II}}(\text{CN})_5]$  at 45 °C at 1300 atmospheres, total time 3 hours.

**Table S1.-** Values of the observed 1<sup>st</sup>-order rate constants for the spontaneous *cis*-to-*trans* isomerisation reaction occurring on the compounds prepared as a function of solvent, temperature and pressure ([compounds] at the 10  $\mu$ M level; value shown corresponds to the average of two or three replicates with an error within the 10-15 % margin).

| Compound         | Solvent  | $T/^{\circ}\text{C}$ | $P/\text{atm.}$ | $10^3 \times k_{\text{obs}}/\text{s}^{-1}$ |
|------------------|----------|----------------------|-----------------|--------------------------------------------|
| <b>py-iso</b>    | Toluene  | 25                   | 1               | 0.030                                      |
|                  |          | 40                   | 1               | 0.11                                       |
|                  |          | 55                   | 1               | 0.50                                       |
|                  | Methanol | 23                   | 1               | 0.094                                      |
|                  |          | 35                   | 1               | 0.30                                       |
|                  |          | 40                   | 300             | 0.75                                       |
|                  |          |                      | 600             | 1.0                                        |
|                  |          |                      | 900             | 1.3                                        |
|                  |          |                      | 1200            | 2.0                                        |
|                  |          |                      | 1500            | 2.3                                        |
|                  |          | 45                   | 1               | 0.56                                       |
| 56               | 1        | 1.2                  |                 |                                            |
| <b>cyano-iso</b> | Toluene  | 25                   | 1               | 0.0097                                     |
|                  |          | 35                   | 1               | 0.028                                      |
|                  |          | 44                   | 1               | 0.11                                       |
|                  |          | 50                   | 1               | 0.19                                       |
|                  |          | 57                   | 1               | 0.45                                       |
|                  | Methanol | 25                   | 1               | 0.0083                                     |
|                  |          | 35                   | 1               | 0.022                                      |
|                  |          | 44                   | 1               | 0.13                                       |
|                  |          | 48                   | 300             | 0.092                                      |
|                  |          |                      | 700             | 0.095                                      |
|                  |          |                      | 1100            | 0.095                                      |
|                  |          |                      | 1500            | 0.092                                      |
|                  |          | 50                   | 1               | 0.21                                       |
| 57               | 1        | 0.37                 |                 |                                            |
| <b>iso-iso</b>   | Toluene  | 30                   | 1               | 0.020                                      |
|                  |          | 39                   | 1               | 0.055                                      |
|                  |          | 51                   | 1               | 0.30                                       |
|                  |          | 60                   | 1               | 0.63                                       |
|                  | Methanol | 30                   | 1               | 0.018                                      |
|                  |          | 39                   | 1               | 0.040                                      |
|                  |          | 51                   | 1               | 0.20                                       |
|                  |          | 60                   | 1               | 0.48                                       |
|                  |          |                      | 400             | 0.42                                       |

|                                 |          |      |        |       |
|---------------------------------|----------|------|--------|-------|
|                                 |          |      | 700    | 0.40  |
|                                 |          |      | 1000   | 0.38  |
|                                 |          |      | 1300   | 0.40  |
| <b>py-isoFe<sup>II</sup></b>    | Methanol | 15   | 1      | 0.045 |
|                                 |          | 25   | 1      | 0.090 |
|                                 |          |      | 400    | 0.090 |
|                                 |          |      | 700    | 0.20  |
|                                 |          |      | 1000   | 0.22  |
|                                 |          |      | 1300   | 0.18  |
|                                 |          | 35   | 1      | 0.31  |
|                                 |          | 45   | 1      | 1.0   |
|                                 | Water    | 15   | 1      | 0.075 |
|                                 |          | 25   | 1      | 0.18  |
|                                 |          | 35   | 1      | 0.60  |
|                                 |          |      | 400    | 0.88  |
|                                 |          | 700  | 0.92   |       |
|                                 |          | 1000 | 0.67   |       |
| <b>cyano-isoFe<sup>II</sup></b> | Methanol | 45   | 1      | 1.5   |
|                                 |          | 25   | 1      | 0.28  |
|                                 |          |      | 400    | 0.020 |
|                                 |          |      | 700    | 0.017 |
|                                 |          |      | 1000   | 0.013 |
|                                 |          |      | 1300   | 0.011 |
|                                 |          | 1600 | 0.0082 |       |
|                                 |          | 35   | 1      | 0.78  |
|                                 |          | 44   | 1      | 2.3   |
|                                 | Water    | 15   | 1      | 0.011 |
|                                 |          | 25   | 1      | 0.017 |
|                                 |          | 35   | 1      | 0.035 |
| 44                              |          | 1    | 0.073  |       |
| 15                              |          | 1    | 0.067  |       |
| 20                              |          | 1    | 0.25   |       |
| <b>iso-isoFe<sup>II</sup></b>   | Methanol | 35   | 1      | 0.75  |
|                                 |          | 45   | 1      | 1.1   |
|                                 |          | 51   | 1      | 1.3   |
|                                 | Water    | 20   | 1      | 0.14  |
|                                 |          | 25   | 1      | 0.21  |
|                                 |          | 35   | 1      | 0.40  |

|                                               |       |    |      |       |
|-----------------------------------------------|-------|----|------|-------|
|                                               |       |    | 400  | 0.45  |
|                                               |       |    | 700  | 0.48  |
|                                               |       |    | 1000 | 0.52  |
|                                               |       |    | 1300 | 0.57  |
|                                               |       |    | 1600 | 0.62  |
|                                               |       | 45 | 1    | 0.73  |
|                                               |       | 51 | 1    | 1.4   |
| <b>py-isoFe<sup>III</sup></b>                 | Water | 15 | 1    | 0.091 |
|                                               |       | 25 | 1    | 0.40  |
|                                               |       | 30 | 400  | 0.64  |
|                                               |       |    | 700  | 0.53  |
|                                               |       |    | 1000 | 0.45  |
|                                               |       |    | 1300 | 0.37  |
|                                               |       |    | 1450 | 0.33  |
|                                               |       |    | 1600 | 0.29  |
|                                               |       | 35 | 1    | 1.2   |
|                                               |       | 45 | 1    | 2.8   |
| <b>Fe<sup>II</sup>-iso-isoFe<sup>II</sup></b> | Water | 30 | 1    | 0.12  |
|                                               |       | 40 | 1    | 0.27  |
|                                               |       | 45 | 400  | 0.47  |
|                                               |       |    | 700  | 0.50  |
|                                               |       |    | 1000 | 0.45  |
|                                               |       |    | 1300 | 0.43  |
|                                               |       |    | 1600 | 0.45  |
|                                               |       | 50 | 1    | 0.69  |
|                                               |       | 60 | 1    | 1.5   |



**Table S2.-** Values of the observed order rate constants for the peroxodisulfate oxidation reaction of the **py-isoFe<sup>II</sup>** compound in aqueous solution as a function of temperature and pressure (**[py-isoFe<sup>II</sup>]** at the 10  $\mu$ M level,  $I = 0.20$  M NaClO<sub>4</sub>).

| $10^3 \times [\text{S}_2\text{O}_8^{2-}] / \text{M}$ | $T / ^\circ\text{C}$ | $P / \text{atm.}$ | $10^4 \times k_{\text{obs}} / \text{s}^{-1}$ |      |
|------------------------------------------------------|----------------------|-------------------|----------------------------------------------|------|
| 0.50                                                 | 15                   | 1                 | 0.080                                        |      |
| 1.0                                                  |                      |                   | 0.23                                         |      |
| 2.0                                                  |                      |                   | 0.33                                         |      |
| 3.0                                                  |                      |                   | 0.52                                         |      |
| 4.0                                                  |                      |                   | 0.967                                        |      |
| 5.0                                                  |                      |                   | 0.92                                         |      |
| 1.0                                                  | 25                   | 1                 | 0.44                                         |      |
| 2.0                                                  |                      |                   | 1.1                                          |      |
| 3.0                                                  |                      |                   | 1.6                                          |      |
| 4.0                                                  |                      |                   | 2.2                                          |      |
| 5.0                                                  |                      |                   | 2.9                                          |      |
| 5.0                                                  | 30                   | 400               | 9.0                                          |      |
|                                                      |                      | 550               | 8.7                                          |      |
|                                                      |                      | 700               | 13                                           |      |
|                                                      |                      | 900               | 15                                           |      |
|                                                      |                      | 1000              | 15                                           |      |
|                                                      |                      | 1100              | 17                                           |      |
|                                                      |                      | 1200              | 25                                           |      |
|                                                      |                      | 1300              | 23                                           |      |
| 0.50                                                 |                      | 35                | 1                                            | 0.90 |
| 1.0                                                  |                      |                   |                                              | 1.3  |
| 2.0                                                  | 2.6                  |                   |                                              |      |
| 3.0                                                  | 3.7                  |                   |                                              |      |
| 4.0                                                  | 4.9                  |                   |                                              |      |
| 5.0                                                  | 7.0                  |                   |                                              |      |
| 0.50                                                 | 45                   | 1                 | 1.4                                          |      |
| 1.0                                                  |                      |                   | 2.7                                          |      |
| 2.0                                                  |                      |                   | 4.8                                          |      |
| 3.0                                                  |                      |                   | 7.2                                          |      |
| 4.0                                                  |                      |                   | 10                                           |      |
| 5.0                                                  |                      |                   | 12                                           |      |
